# Supplementary material for: Facile Fabrication of Mixed–Cation FA1−XCsXPbI3 Perovskites Thin Films for Photodetector Applications
Source: MDPI journal article supplement (doi:10.3390/photonics10030312), 2023-03-14
Supplement: s1 [file s1]

---

# Supporting Information

## Facile Fabrication of Mixed-Cation $\text{FA}_{1-x}\text{Cs}_x\text{PbI}_3$ Perovskites Thin Films for Photodetector Applications

Fenyun Wang <sup>1</sup>, Pachaiyappan Murugan <sup>1</sup>, Shunhong Dong <sup>1</sup>, Xiaolu Zheng <sup>1</sup>, Jiaxiu Man <sup>1</sup>, Zhiyong Liu <sup>1,2</sup>, Weibin Zhang <sup>1,2</sup>, Ting Zhu <sup>1,2</sup> and Hong-En Wang <sup>1,2,\*</sup>

<sup>1</sup> Yunnan Key Laboratory of Optoelectronic Information Technology, College of Physics and Electronic Information, Yunnan Normal University, Kunming 650500, China; p.kumu29@gmail.com (P.M.); shunhong.dong@outlook.com (S.D.); zhengxiaolu@ynnu.edu.cn (X.Z.); manjiaxiu@ynnu.edu.cn (J.M.); liuzhiyong@ynnu.edu.cn (Z.L.); 220001@ynnu.edu.cn (W.Z.); zhut0002@ynnu.edu.cn (T.Z.)

<sup>2</sup> Key Laboratory of Advanced Technique & Preparation for Renewable Energy Materials, Ministry of Education, Yunnan Normal University, Kunming 650500, China

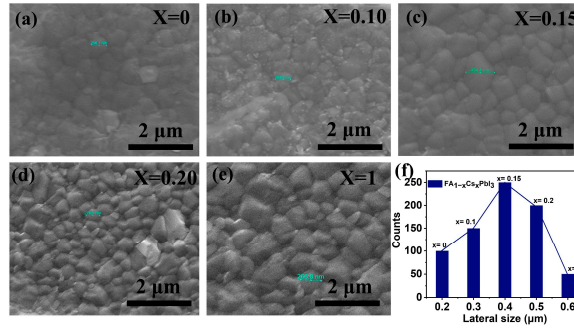

**Figure S1.** (a–e) SEM images of  $\text{FA}_{1-x}\text{Cs}_x\text{PbI}_3$  thin films with different  $\text{Cs}^+$  contents ( $x = 0, 0.10, 0.15, 0.20$  and 1, respectively). (f) Statistical diagram of the grain sizes of the  $\text{FA}_{1-x}\text{Cs}_x\text{PbI}_3$  thin films.

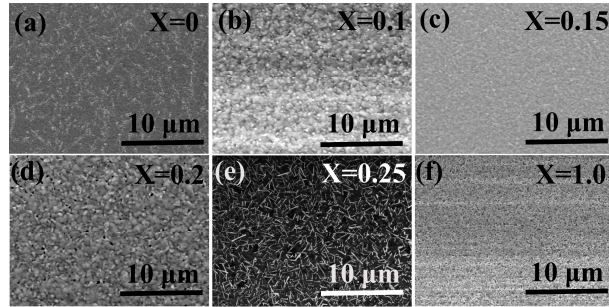

**Figure S2.** (a–f) SEM images of  $\text{FA}_{1-x}\text{Cs}_x\text{PbI}_3$  thin films with different  $\text{Cs}^+$  contents ( $x = 0, 0.10, 0.15, 0.20, 0.25$ , and 1.0, respectively).

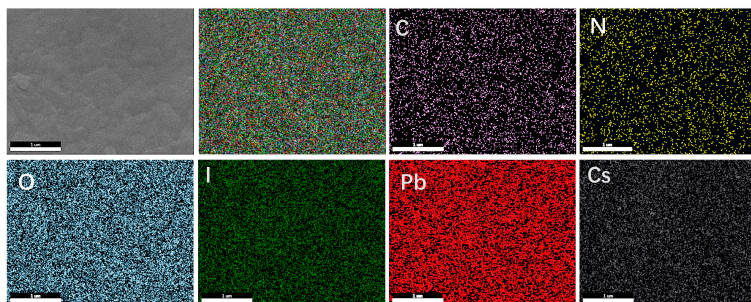

**Figure S3.** EDX elemental mapping of  $\text{FA}_{0.85}\text{Cs}_{0.15}\text{PbI}_3$  thin film.

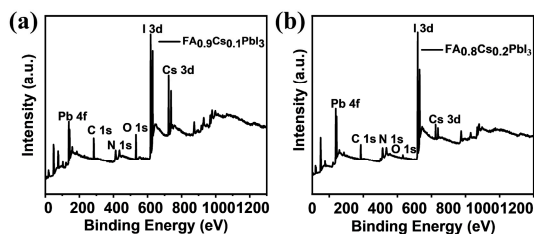

**Figure S4.** Survey XPS spectra of (a)  $\text{FA}_{0.9}\text{Cs}_{0.1}\text{PbI}_3$  and (b)  $\text{FA}_{0.8}\text{Cs}_{0.2}\text{PbI}_3$ , respectively.

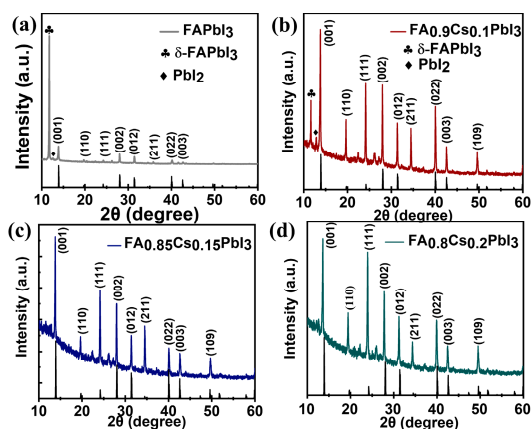

**Figure S5.** (a-d) XRD patterns of  $\text{FAPbI}_3$ ,  $\text{FA}_{0.9}\text{Cs}_{0.1}\text{PbI}_3$ ,  $\text{FA}_{0.85}\text{Cs}_{0.15}\text{PbI}_3$  and  $\text{FA}_{0.8}\text{Cs}_{0.2}\text{PbI}_3$  thin films, respectively.

---

**Table S1.** The PL data of  $\text{FA}_{1-x}\text{Cs}_x\text{PbI}_3$  thin films ( $x = 0, 1, 0.1, 0.15$  and  $0.2$ , respectively) with peak intensity, wavelength position, and FWHM.

|                        | <b>X=0</b> | <b>X=1</b> | <b>X=0.10</b> | <b>X=0.15</b> | <b>X=0.20</b> |
|------------------------|------------|------------|---------------|---------------|---------------|
| <b>Intensity (A.U)</b> | 12457      | 13850      | 12700         | 97806         | 71143         |
| <b>Wavelength (nm)</b> | 801        | 760        | 790           | 789           | 788           |
| <b>FWHM (nm)</b>       | 44.15      | 42.31      | 42.58         | 36.18         | 42.42         |
